# Supplementary material
Source: MDPI journal article supplement (https://www.mdpi.com/2673-6497/2/2/12)
Supplement: s1 [file s1 › solids-1153079-supplementary.pdf]

Supplementary Information for

# Evaluation of $((\text{La}_{0.60}\text{Sr}_{0.40})_{0.95}\text{Co}_{0.20}\text{Fe}_{0.80}\text{O}_{3-x})\text{-Ag}$ composite anode for direct ammonia solid oxide fuel cells and effect of Pd impregnation on the electrochemical performance

Shambhu Singh Rathorea<sup>a</sup>, Aniruddha P. Kulkarni<sup>a\*</sup>, Daniel Fini<sup>a</sup>, Sarbjit Giddey<sup>a</sup> and Aaron Seeber<sup>b</sup>

a: CSIRO Energy, Private Bag 10, Clayton South 3169, Victoria, Australia |

b: CSIRO Manufacturing, Private Bag 31, Clayton South 3169, Victoria and Australia

\*Corresponding author email: [Aniruddha.Kulkarni@csiro.au](mailto:Aniruddha.Kulkarni@csiro.au)

## Supporting Figure

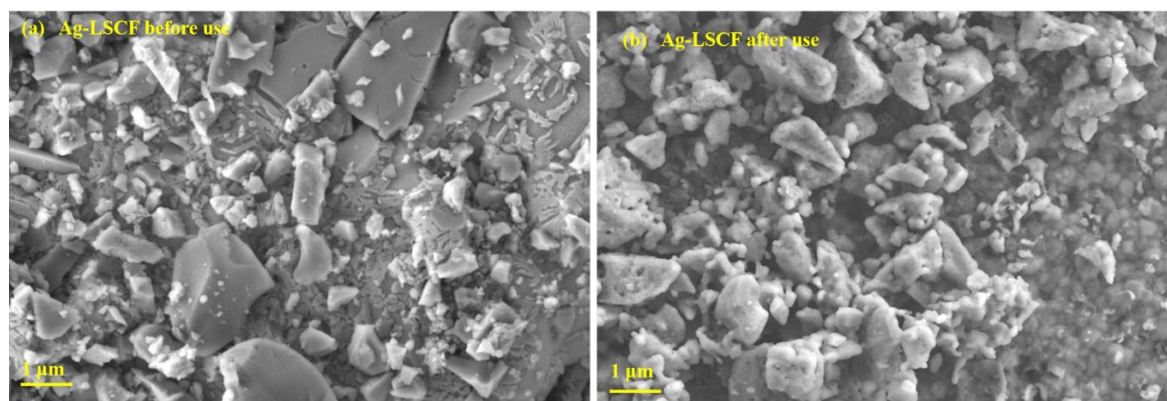

Figure S1. SEM image of Ag-LSCF anode surface as prepared (a) and after cell operation (b).

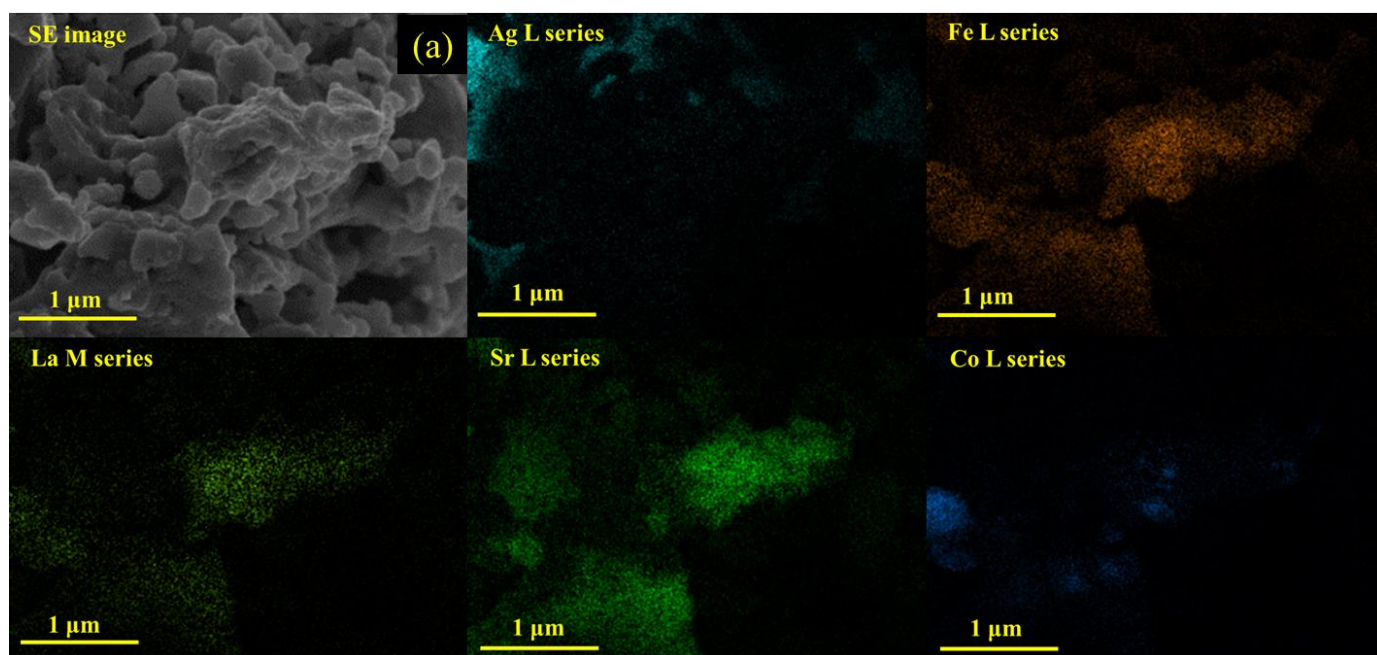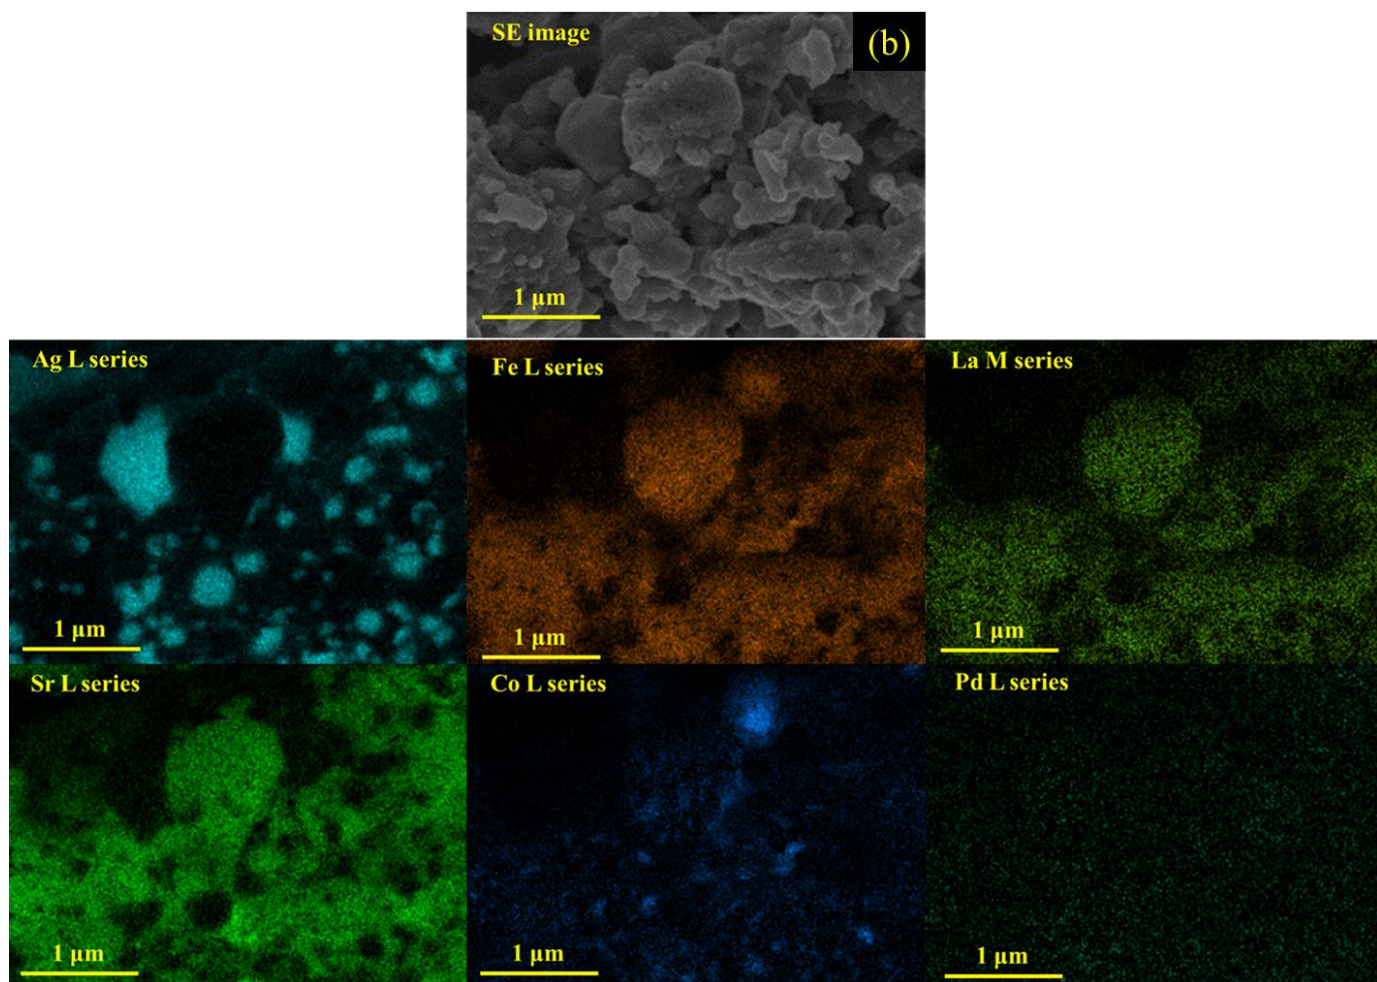

Figure S2. SE image and EDS maps of Ag-LSCF anode after test (a), SEM image and EDS maps for Pd decorated Ag-LSCF anode after test (b).

Table S1. Percentage difference in maximum thermodynamic efficiency of cell with two different ammonia utilisation pathways.

| Temperature (°C) | Ammonia utilisation path                    | Maximum Gibbs free energy available for 1 mole of ammonia (kJ) | % difference in maximum thermodynamic efficiency for ammonia direct electro-oxidation and oxidation of hydrogen produced after complete decomposition of ammonia |
|------------------|---------------------------------------------|----------------------------------------------------------------|------------------------------------------------------------------------------------------------------------------------------------------------------------------|
| 700              | Ammonia direct utilisation                  | $\Delta G_{NH_3} = -349.67$                                    | $\frac{\Delta G_{NH_3} - 1.5 \times \Delta G_{H_2}}{1.5 \times \Delta G_{H_2}} \times 100 = 20$                                                                  |
|                  | Ammonia utilisation after complete cracking | $1.5 \times \Delta G_{H_2} = -1.5 \times 194.27$               |                                                                                                                                                                  |
| 800              | Ammonia direct utilisation                  | $\Delta G_{NH_3} = -353.00$                                    | $\frac{\Delta G_{NH_3} - 1.5 \times \Delta G_{H_2}}{1.5 \times \Delta G_{H_2}} \times 100 = 24.7$                                                                |
|                  | Ammonia utilisation after complete cracking | $1.5 \times \Delta G_{H_2} = -1.5 \times 188.66$               |                                                                                                                                                                  |
